# Supplementary material for: Impaired Structural Network Properties Caused by White Matter Hyperintensity Related to Cognitive Decline
Source: Front Neurol. 2020 Apr 21;11:250. doi: 10.3389/fneur.2020.00250 (PMC7186334; doi:10.3389/fneur.2020.00250)
Supplement: Supplementary file 1 [file Table_1.xlsx]

## Sheet: Sheet1
Table s1 Group difference on WM network properties at the level of network
network metrics	Controls	WMH without CI	WMH with CI	p Value
density	0.391±0.005	0.382±0.005	0.382±0.005	0.371
strength	96.78±2.140	87.34±2.325a	84.33±2.395a	<0.001
Clustering coefficient	0.329±0.006	0.312±0.007	0.311±0.007	0.109
Path length	2.839±0.046	2.963±0.050a	3.125±0.051a	<0.001
Global efficiency	0.354±0.002	0.340±0.005a	0.327±0.002a	<0.001
Local efficiency	0.437±0.010	0.407±0.011a	0.398±0.011	0.032
Values are presented as means ± standard deviation (SD). P＜0.05 appears in bold. Firstly, One-way ANCOVA was used to explore group difference among the three group and only properties at P＜0.05 were subsequently performed pairwise post hoc comparisons. a Indicates pairwise post hoc comparisons remained statistically significant difference after Bonferroni correction for multiple comparisons（P＜0.0…

## Sheet: Sheet2
	Network strength	96.78±2.140	87.34±2.325a	84.33±2.395a
